# Supplementary material
Source: PubMed Central journal article supplement (PMC3256863)
Supplement: supp_M111.284224_jbc.M111.284224-10.pdf [file supp_M111.284224_jbc.M111.284224-10.pdf]

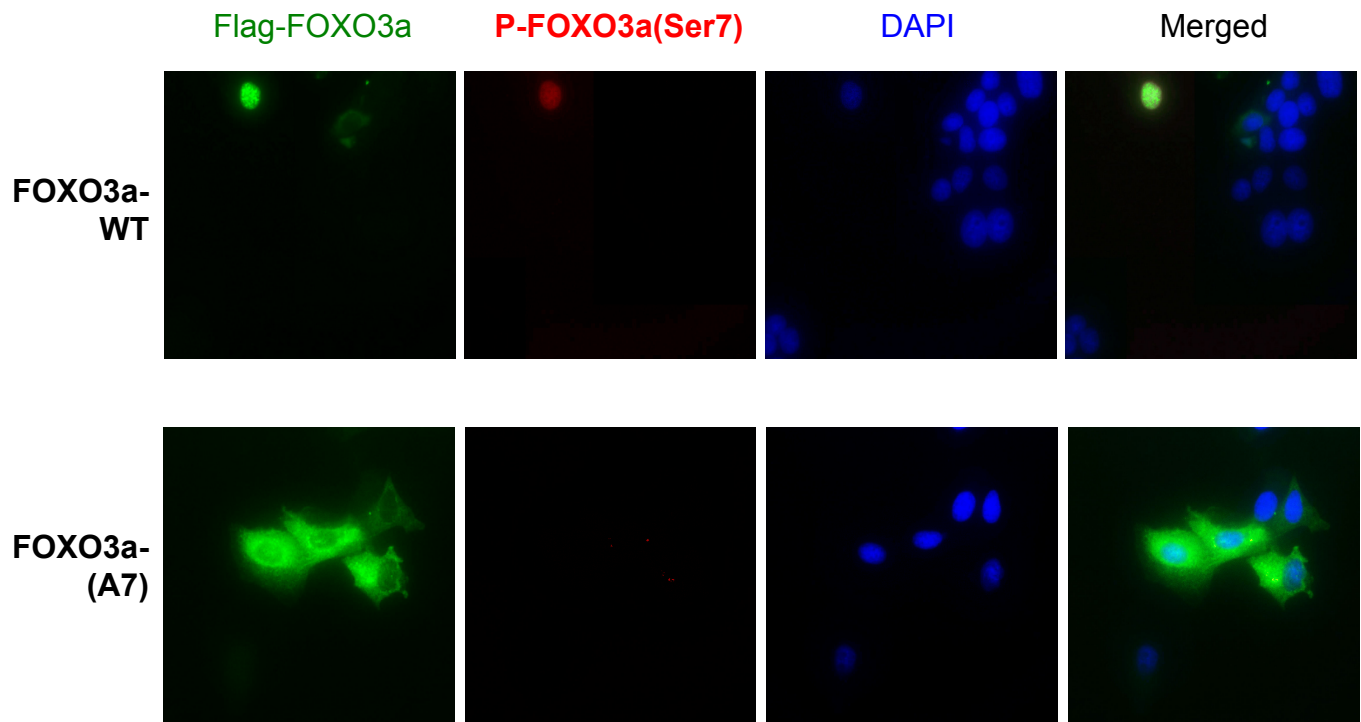

**Supplementary Figure S6. The P-FOXO3a(Ser-7) recognises only the wild-type but not the Ala-7 FOXO3a following doxorubicin treatment**

MCF-7 cells were seeded into slide chamber and transfected with either the pCMV-Flag-FOXO3a (WT) or the pCMV-Flag-FOXO3a A7 (Ser to Ala-7) mutant incubated with media in the absence or presence of doxorubicin for 16 h. Immunofluorescent staining was then performed using the Flag and P-FOXO3a (Ser-7) antibodies and DAPI. All images shown are typical results obtained from at least 10 different fields.
